# Supplementary material for: {PMo6O24N4} subunit functionalized by organonitrogen through Mo–N bonds: hydrothermal synthesis, structure, photocatalytic, and fluorescence sensing properties
Source: Royal Society of Chemistry journal article supplement (doi:10.1039/d1nj00887k), 2021-01-01
Supplement: d1nj00887k1.pdf [file d1nj00887k1.pdf]

Electronic Supplementary Material (ESI) for CrystEngComm.  
This journal is © The Royal Society of Chemistry 2020

## Electronic Supporting Information (ESI†)

### The $\{\text{PMo}_6\text{O}_{24}\text{N}_4\}$ subunit functionalized by organonitrogen through Mo-N bonds: hydrothermal synthesis, structure, photocatalytic and fluorescence sensing properties

Haiyan Yu, Jun Ying\*, Chenxi Sun, Liang Jin, Aixiang Tian, Xiuli Wang\*

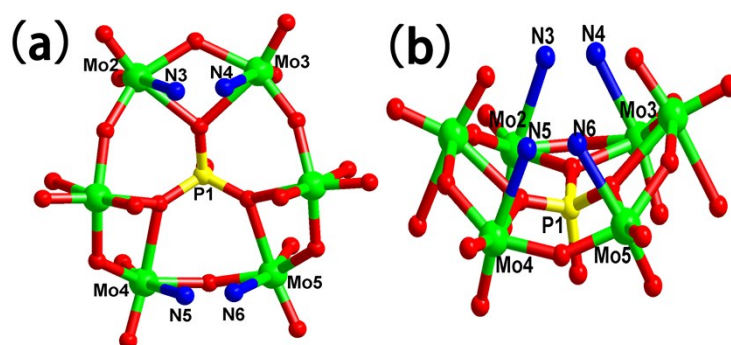

**Fig. S1** The unit diagram of the of the  $\{\text{PMo}_6\}$  polyanion viewing along the front (a) and side (b) respectively.

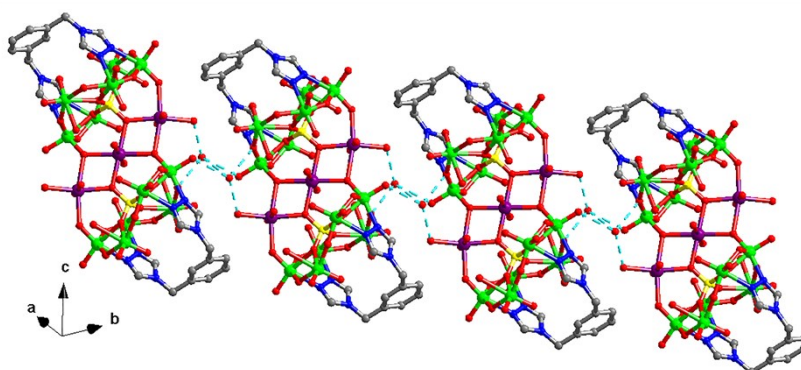

**Fig. S2** The 1D supramolecular structure of compound **1** through hydrogen bonding interactions.

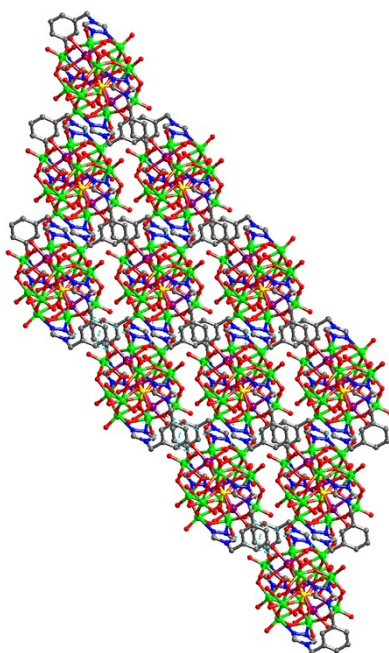

**Fig. S3** The 2D supramolecular structure of compound **1**.

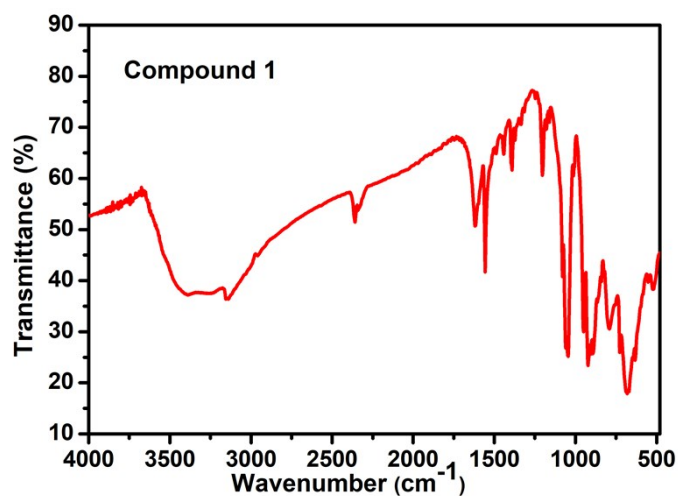

**Fig. S4** The IR spectra of compound **1**.

The IR spectra of compound **1** is shown in Fig. S4. The characteristic peaks at 779, 680 and 630  $\text{cm}^{-1}$  are attributed to  $\nu(\text{Mo-O}_b)$  vibrations, respectively. The characteristic peaks at 930 and 889  $\text{cm}^{-1}$  are attributed to  $\nu(\text{Mo-O}_t)$  vibrations. The characteristic peak of strong absorption band in 1075  $\text{cm}^{-1}$  is attributed to the P-O vibration. The peaks in the range of 1630–1392  $\text{cm}^{-1}$  could be regarded as the characteristic bands of the organic ligand. The vibration bands around 3350  $\text{cm}^{-1}$  are indicative of the presence of lattice water molecules.

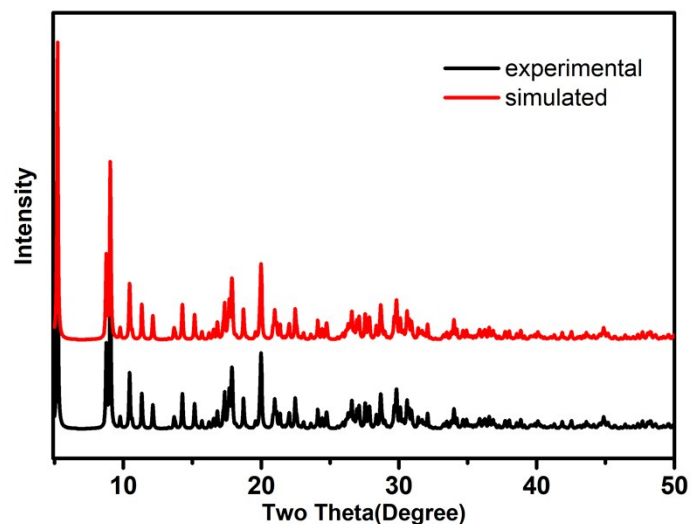

**Fig. S5** The PXR D pattern of the compound **1**.

Fig. S5 shows the PXR D pattern of the compound **1**. The experimental results clearly show that the result obtained from the test is consistent with the simulated spectrum, which indicates that the sample has very good phase purity.

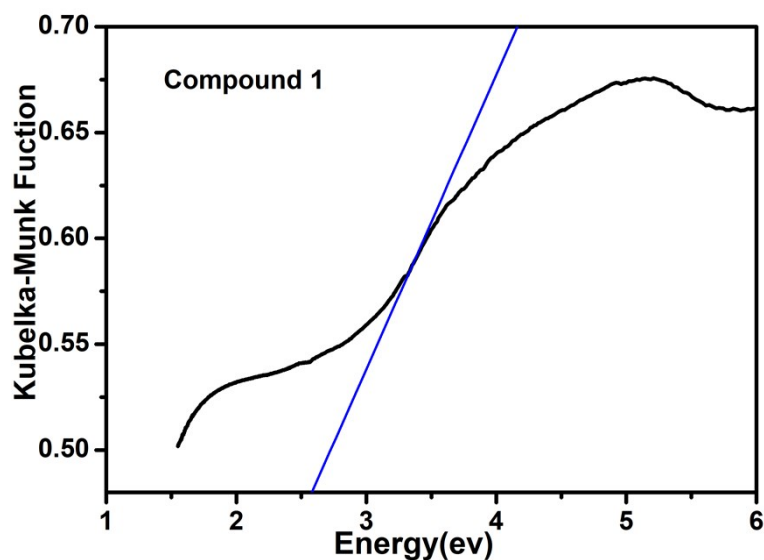

**Fig. S6** Kubelka-Munk-transformed diffuse reflectance spectra of compound **1**.

Use a mortar to fully grind the crystal **1** into powder and measure its optical solid-state diffuse reflectance spectrum analysis. The purpose is to obtain the conductivity of the compound and further obtain its band gap value ( $E_g$ ). The energy band gap ( $E_g$ ) obtained by extrapolating the linear part of the absorption edge is approximately 2.57 eV (see Fig. S6), indicating its semiconductor property. It further proves that it has an applicable photocatalytic ability.

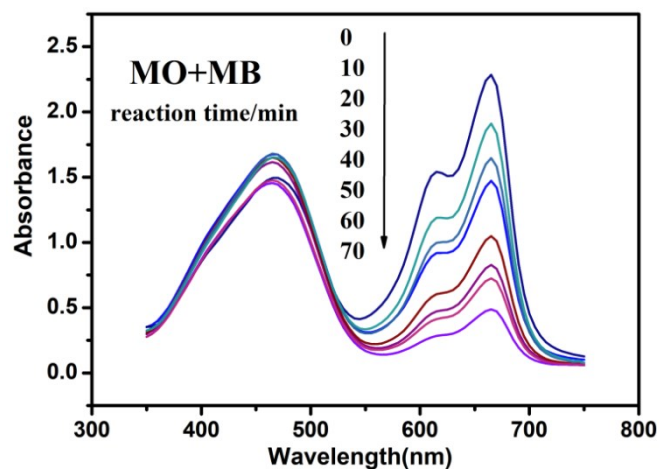

Fig. S7 Absorption spectra of the MO-MB solution during the decomposition reaction under UV irradiation with the presence of compound.

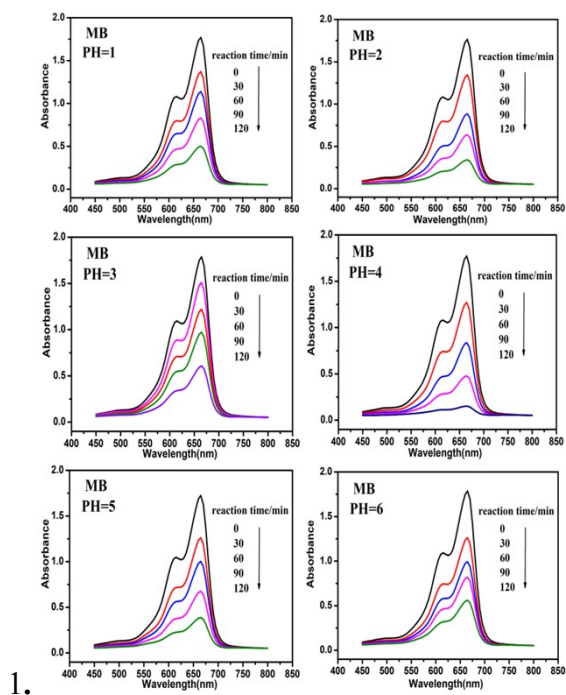

1.

Fig. S8 Photocatalytic degradation of MB under different pH conditions within 120 minutes.

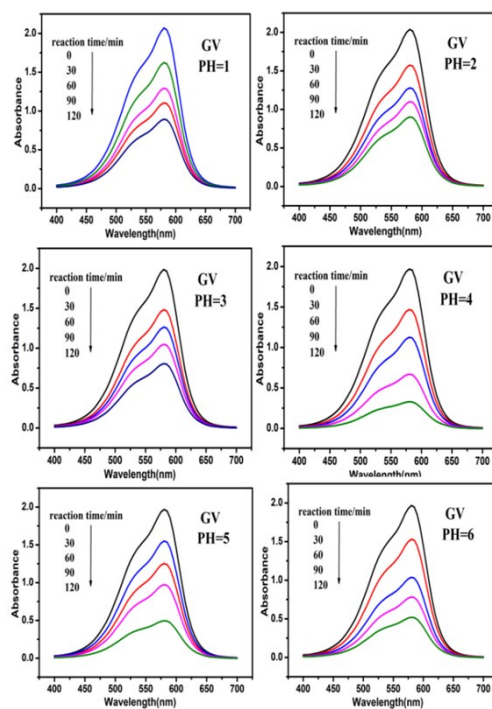

**Fig. S9** Photocatalytic degradation of GV under different pH conditions within 120 minutes.

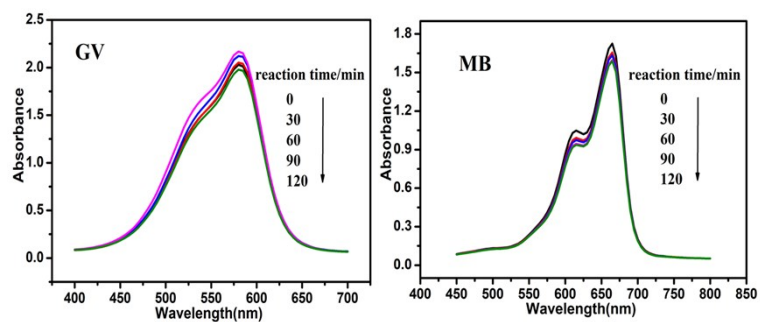

**Fig. S10** Without adding catalyst **1**, the absorbance values of GV (left) and MB (right) change within 120 minutes.

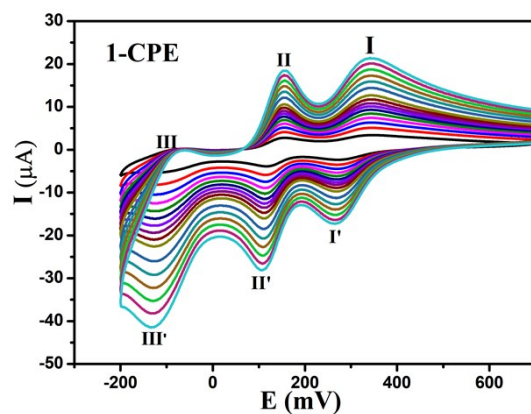

**Fig. S11** The cyclic voltammograms of 1-CPE in 30 ml mixed 0.1 M  $\text{H}_2\text{SO}_4$  + 0.5 M  $\text{Na}_2\text{SO}_4$  aqueous solution at different scan rates (from inner to outer: 20, 40, 60, 80, 100, 120, 140, 160, 180, 200, 250, 300, 350, 400, 450 and 500  $\text{mV}\cdot\text{s}^{-1}$ ).

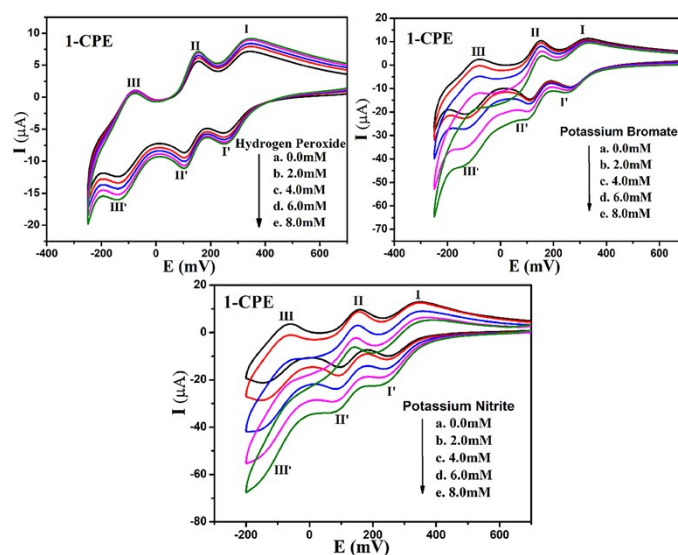

**Fig. S12** Cyclic voltammograms of the 1-CPE in 0.1 M  $\text{H}_2\text{SO}_4$  + 0.5 M  $\text{Na}_2\text{SO}_4$  aqueous solution containing 0 (a); 2 (b); 4 (c); 6 (d) and 8 (e) mM  $\text{H}_2\text{O}_2$ ,  $\text{BrO}_3^-$ ,  $\text{NO}_2^-$  and AA. Scan rate: 250  $\text{mV}\cdot\text{s}^{-1}$ .

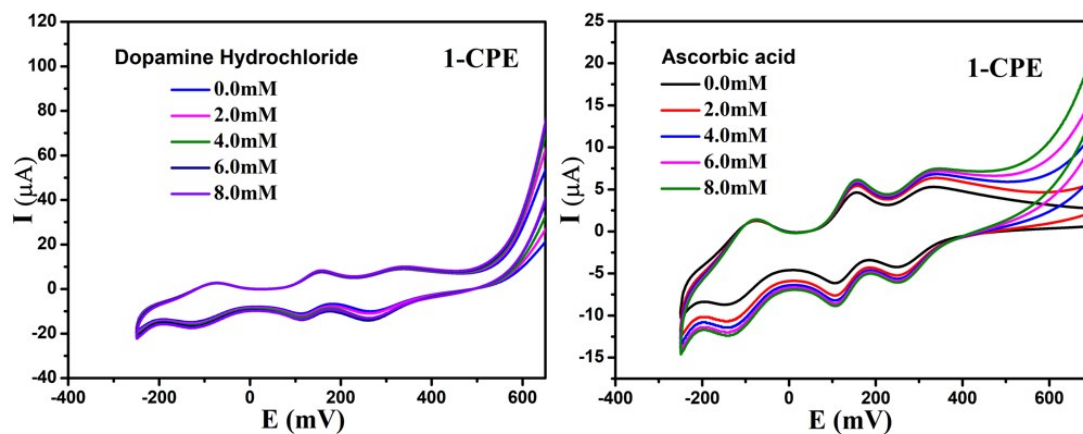

**Fig. S13** The usage of 1-CPE to catalyze the oxidation of dopamine hydrochloride (DP) and ascorbic acid (AA) (scan rate:  $250 \text{ mV}\cdot\text{s}^{-1}$ )

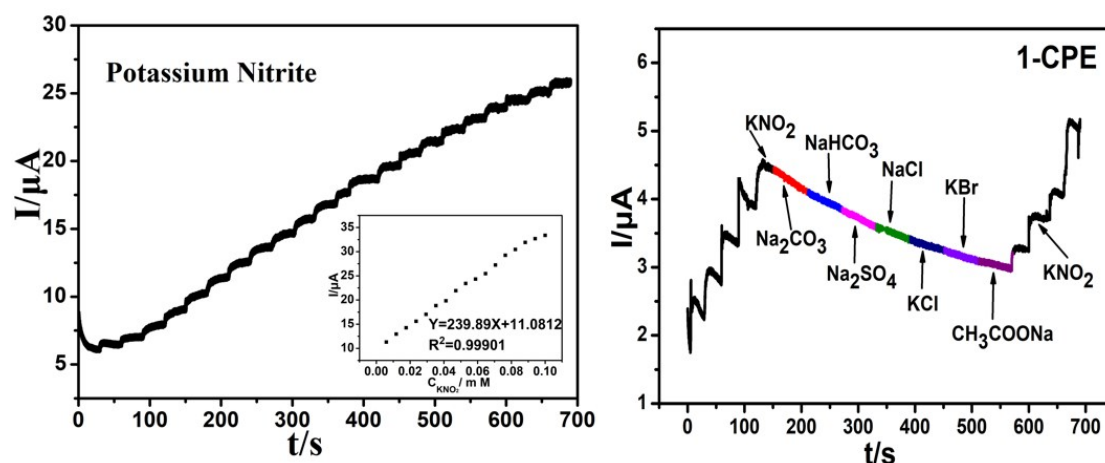

**Fig. S14** Left: Amperometric response for the 1-CPE on successive addition of 0.1 mM nitrite to 0.1 M  $\text{H}_2\text{SO}_4$ +0.5 M  $\text{Na}_2\text{SO}_4$  aqueous solution. The inset: the steady-state calibration curve for current versus hydrogen peroxide concentration. Right: Amperometric current responses of 1-CPE in aqueous solution upon addition of various inorganic salts.

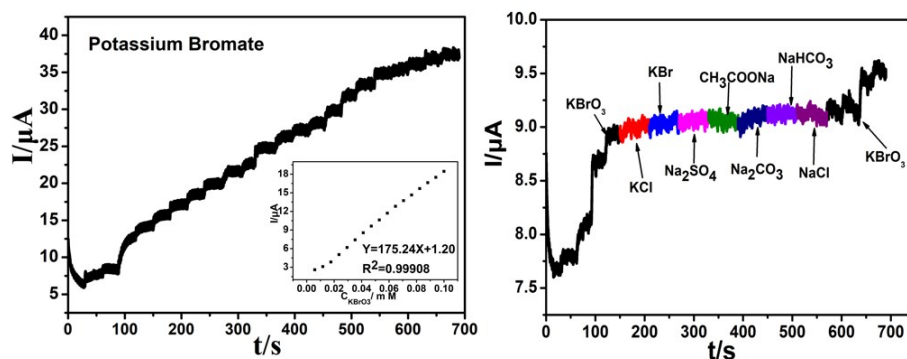

**Fig. S15** Left: Amperometric response for the 1-CPE on successive addition of 0.1 mM bromate to 0.1 M H<sub>2</sub>SO<sub>4</sub>+0.5 M Na<sub>2</sub>SO<sub>4</sub> aqueous solution. The inset: the steady-state calibration curve for current versus hydrogen peroxide concentration. Right: Amperometric current responses of 1-CPE in aqueous solution upon addition of various inorganic salts.

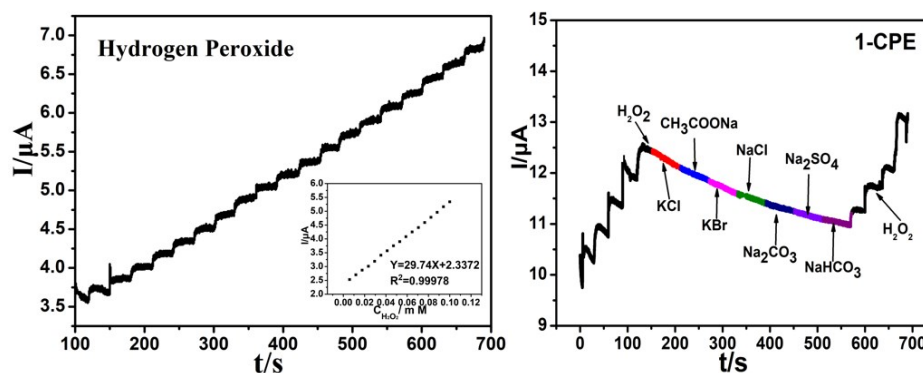

**Fig. S16** Left: Amperometric response for the 1-CPE on successive addition of 0.1 mM hydrogen peroxide to 0.1 M H<sub>2</sub>SO<sub>4</sub>+0.5 M Na<sub>2</sub>SO<sub>4</sub> aqueous solution. The inset: the steady-state calibration curve for current versus hydrogen peroxide concentration. (b) Amperometric current responses of 1-CPE in aqueous solution upon addition of various inorganic salts.

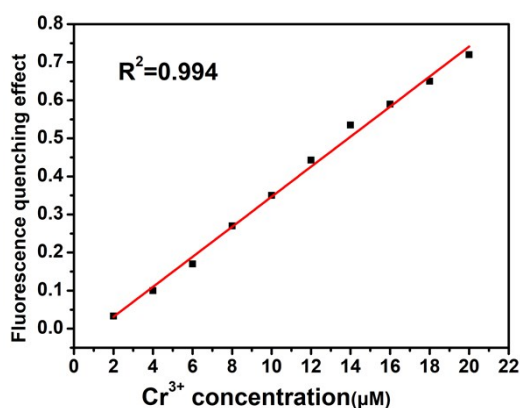

**Fig. S17** The linear relationship of the fluorescence quenching effect with increasing of Cr<sup>3+</sup> concentration.



**Table. S1.** Crystal Data and Structure Refinement Parameters for Compound **1**.

|                                                                |                                                                                                                 |
|----------------------------------------------------------------|-----------------------------------------------------------------------------------------------------------------|
| formula                                                        | C <sub>24</sub> H <sub>50</sub> Cd <sub>3</sub> Mo <sub>12</sub> N <sub>12</sub> O <sub>57</sub> P <sub>2</sub> |
| <i>f</i> w                                                     | 2963                                                                                                            |
| cryst syst                                                     | Triclinic                                                                                                       |
| space group                                                    | P -1                                                                                                            |
| <i>a</i> (Å)                                                   | 10.2923(18)                                                                                                     |
| <i>b</i> (Å)                                                   | 10.3806(18)                                                                                                     |
| <i>c</i> (Å)                                                   | 17.587(3)                                                                                                       |
| <i>V</i> (Å <sup>3</sup> )                                     | 1763.8(5)                                                                                                       |
| <i>Z</i>                                                       | 1                                                                                                               |
| <i>D<sub>c</sub></i> (g cm <sup>-3</sup> )                     | 2.805                                                                                                           |
| <i>R</i> <sub>int</sub>                                        | 0.0269                                                                                                          |
| GOF                                                            | 1.041                                                                                                           |
| <i>R</i> <sub>I</sub> <sup>a</sup> [ <i>I</i> >2σ( <i>I</i> )] | 0.0543                                                                                                          |
| <i>wR</i> <sub>2</sub> <sup>b</sup> (all data)                 | 0.1642                                                                                                          |

$$^aR_1 = \Sigma||F_o|-|F_c||/\Sigma|F_o|; \quad ^b wR_2 = \Sigma[w(F_o^2 - F_c^2)^2]/\Sigma[w(F_o^2)]^{1/2}$$

**Table. S2.** Selected bond distances (Å) and angles (°) for compound **1**.

|                     |            |                   |          |
|---------------------|------------|-------------------|----------|
| Cd(1)-O(18)#1       | 2.265(5)   | Cd(2)-O(3)        | 2.205(7) |
| Cd(1)-O(19)         | 2.298(6)   | Cd(2)-O(2)        | 2.268(7) |
| Cd(1)-O(9)          | 2.331(6)   | Cd(2)-O(9)#1      | 2.445(6) |
| Cd(2)-O(18)         | 2.245(5)   | Cd(2)-O(1)        | 2.241(7) |
| Cd(2)-O(4)          | 2.330(6)   | N(6)-N(5)-Mo(4)   | 119.2(5) |
| O(18)#1-Cd(1)-O(18) | 180.0      | O(18)-Cd(1)-O(19) | 83.5(2)  |
| O(18)#1-Cd(1)-O(19) | 96.5(2)    | O(1)-Cd(2)-O(2)   | 81.5(3)  |
| O(18)-Cd(1)-O(9)#1  | 78.55(19)  | O(4)-Cd(2)-O(9)#1 | 168.0(2) |
| O(18)-Cd(1)-O(9)    | 101.45(19) | O(3)-Cd(2)-O(18)  | 96.6(3)  |
| O(19)-Cd(1)-O(19)#1 | 180        | O(3)-Cd(2)-O(1)   | 97.6(3)  |
| O(19)-Cd(1)-O(9)#1  | 90.6(2)    | O(3)-Cd(2)-O(4)   | 95.1(3)  |
| O(19)-Cd(1)-O(9)    | 89.4(2)    | O(3)-Cd(2)-O(9)#1 | 82.9(3)  |

---

|                    |           |                    |          |
|--------------------|-----------|--------------------|----------|
| O(9)-Cd(1)-O(9)#1  | 180       | O(3)-Cd(2)-O(2)    | 174.9(3) |
| O(18)-Cd(2)-O(4)   | 92.0(2)   | O(2)-Cd(2)-O(4)    | 90.0(3)  |
| O(18)-Cd(2)-O(9)#1 | 76.56(19) | O(2)-Cd(2)-O(9)#1  | 92.2(3)  |
| O(18)-Cd(2)-O(2)   | 83.4(2)   | O(24)-Mo(5)-N(6)   | 79.4(3)  |
| O(1)-Cd(2)-O(18)   | 163.1(2)  | O(25)-Mo(5)-N(6)   | 91.4(3)  |
| O(1)-Cd(2)-O(4)    | 95.7(2)   | O(26)-Mo(5)-N(6)   | 75.6(3)  |
| O(1)-Cd(2)-O(9)#1  | 96.3(2)   | O(1)-Cd(2)-O(2)    | 81.5(3)  |
| O(4)-Cd(2)-O(9)#1  | 168.0(2)  | O(7)-Mo(2)-N(3)    | 90.9(3)  |
| O(3)-Cd(2)-O(18)   | 96.6(3)   | O(9)-Mo(2)-N(3)    | 164.8(3) |
| O(3)-Cd(2)-O(1)    | 97.6(3)   | O(6)-Mo(3)-N(4)    | 92.9(3)  |
| O(3)-Cd(2)-O(4)    | 95.1(3)   | O(11)-Mo(3)-N(4)   | 72.3(2)  |
| O(3)-Cd(2)-O(9)#1  | 82.9(3)   | O(10)-Mo(3)-N(4)   | 78.0(3)  |
| O(3)-Cd(2)-O(2)    | 174.9(3)  | O(8)-Mo(3)-N(4)    | 75.4(3)  |
| O(2)-Cd(2)-O(4)    | 90.0(3)   | O(5)-Mo(3)-N(4)    | 161.7(3) |
| O(2)-Cd(2)-O(9)#1  | 92.2(3)   | Cd(2)-O(18)-Cd(1)  | 106.3(2) |
| O(24)-Mo(5)-N(6)   | 79.4(3)   | P(1)-O(18)-Cd(1)   | 120.9(3) |
| O(25)-Mo(5)-N(6)   | 91.4(3)   | P(1)-O(18)-Cd(2)   | 132.9(3) |
| O(26)-Mo(5)-N(6)   | 75.6(3)   | Cd(2)-O(1)-H(1A)   | 126.2    |
| O(23)-Mo(5)-N(6)   | 80.1(2)   | Cd(2)-O(1)-H(1B)   | 125.8    |
| O(4)-Mo(5)-N(6)    | 163.5(3)  | Cd(1)-O(19)-H(19A) | 111.8    |
| O(27)-Mo(4)-N(5)   | 87.5(3)   | Cd(1)-O(19)-H(19B) | 111.7    |
| O(26)-Mo(4)-N(5)   | 75.1(3)   | Mo(5)-O(4)-Cd(2)   | 131.5(3) |
| O(21)-Mo(4)-N(5)   | 81.8(2)   | Cd(1)-O(9)-Cd(2)#1 | 98.1(2)  |
| O(20)-Mo(4)-N(5)   | 80.3(3)   | Mo(2)-O(9)-Cd(1)   | 130.2(3) |
| O(22)-Mo(4)-N(5)   | 167.4(3)  | Mo(2)-O(9)-Cd(2)#1 | 129.5(3) |
| O(12)-Mo(2)-N(3)   | 78.9(3)   | C(1)-N(4)-Mo(3)    | 134.3(7) |
| O(11)-Mo(2)-N(3)   | 71.8(2)   | N(5)-N(6)-Mo(5)    | 118.4(5) |
| O(8)-Mo(2)-N(3)    | 75.6(2)   | C(12)-N(6)-Mo(5)   | 134.5(6) |
| O(4)-Cd(2)-O(9)#1  | 168.0(2)  | O(7)-Mo(2)-N(3)    | 90.9(3)  |

---

|                 |          |                  |          |
|-----------------|----------|------------------|----------|
| N(4)-N(3)-Mo(2) | 115.2(5) | C(11)-N(5)-Mo(4) | 132.9(6) |
| C(2)-N(3)-Mo(2) | 137.3(6) | C(11)-N(5)-N(6)  | 107.6(7) |
| C(2)-N(3)-N(4)  | 106.4(7) | Cd(2)-O(3)-H(3A) | 113.1    |
| C(2)-N(2)-C(3)  | 125.3(9) | Cd(2)-O(3)-H(3B) | 138.5    |
| C(1)-N(2)-C(2)  | 106.0(7) | Cd(2)-O(2)-H(2A) | 119.2    |
| C(1)-N(2)-C(3)  | 128.7(8) | Cd(2)-O(2)-H(2B) | 135.8    |

Symmetry codes:#1 -x+1,-y+1,-z+1

**Table S3.** The analytical data for **1**–CPE as amperometric sensors.

| substances                    | Temperature | Response time | Concentration range                         | Sensitivity                | Correlation coefficient | Detection limit        |
|-------------------------------|-------------|---------------|---------------------------------------------|----------------------------|-------------------------|------------------------|
| H <sub>2</sub> O <sub>2</sub> | 25          | 2.7s          | 4×10 <sup>-3</sup> –9.2×10 <sup>-2</sup> mM | 28.69 μA mM <sup>-1</sup>  | 0.99989                 | 1.1×10 <sup>-5</sup> M |
| KBrO <sub>3</sub>             | 25          | 3.2s          | 4×10 <sup>-3</sup> –9.2×10 <sup>-2</sup> mM | 169.33 μA mM <sup>-1</sup> | 0.99942                 | 6.8×10 <sup>-4</sup> M |
| KNO <sub>2</sub>              | 25          | 2.4s          | 4×10 <sup>-3</sup> –9.2×10 <sup>-2</sup> mM | 239.89 μA mM <sup>-1</sup> | 0.99901                 | 4.2×10 <sup>-4</sup> M |
